# Supplementary material for: Improved electrochemical performance of nitrogen-containing copper-based 1D metal organic framework derived from highly connective pyridine-2,4,6-tricarboxylic acid for hybrid supercapacitors
Source: Royal Society of Chemistry journal article supplement (doi:10.1039/d4ta05425c), 2025-01-01
Supplement: d4ta05425c1.pdf [file d4ta05425c1.pdf]

## Improving electrochemical performance of nitrogen containing copper metal organic framework derived from highly connective 2,4,6-pyridinetricarboxylic acid for hybrid supercapacitor

### Supplementary Material

Crystallographic data for the structural analysis have been deposited with the Cambridge Crystallographic Data Centre, CCDC No. 2011994 for **Cu-PTA-MOF**. Copy of this information may be obtained free of charge from the Director, CCDC, 12 Union Road, Cambridge CB2 1EZ, UK (fax: +44-1223-336033; e-mail: [deposit@ccdc.cam.ac.uk](mailto:deposit@ccdc.cam.ac.uk) or [www: http://www.ccdc.cam.ac.uk](http://www.ccdc.cam.ac.uk)).

**Table S1** Crystal data and structure refinement parameters for **Cu-PTA-MOF**.

|                                            | <b>Cu-PTA-MOF</b>                                                |
|--------------------------------------------|------------------------------------------------------------------|
| Empirical formula                          | C <sub>16</sub> H <sub>9</sub> CuKN <sub>2</sub> O <sub>13</sub> |
| Formula weight                             | 539.89                                                           |
| Crystal system                             | Monoclinic                                                       |
| Space group                                | <i>P2/c</i>                                                      |
| <i>a</i> (Å)                               | 11.0915 (3)                                                      |
| <i>b</i> (Å)                               | 19.8193 (3)                                                      |
| <i>c</i> (Å)                               | 11.5477 (2)                                                      |
| $\beta$ (°)                                | 110.420 (2)                                                      |
| <i>V</i> (Å <sup>3</sup> )                 | 2378.96 (9)                                                      |
| <i>Z</i>                                   | 4                                                                |
| Diffractionmeter                           |                                                                  |
| $\lambda$ (Å)                              |                                                                  |
| <i>D<sub>c</sub></i> (g cm <sup>-3</sup> ) | 1.507                                                            |
| $\mu$ (mm <sup>-1</sup> )                  | 3.47                                                             |
| $\theta$ range (°)                         | 4.7-71.3                                                         |
| Measured refls.                            | 11490                                                            |
| Independent refls.                         | 4522                                                             |

|                                                                                 |             |
|---------------------------------------------------------------------------------|-------------|
| $R_{\text{int}}$                                                                | 0.021       |
| S                                                                               | 1.05        |
| R1/wR2                                                                          | 0.079/0.244 |
| $\Delta\rho_{\text{max}}/\Delta\rho_{\text{min}}$ ( $\text{e}\text{\AA}^{-3}$ ) | 2.06/-0.79  |

**Table S2** Selected bond distances and angles( $\text{\AA}$ ,  $^{\circ}$ )

| Complex             | Cu-       |            |           |            |           |
|---------------------|-----------|------------|-----------|------------|-----------|
| <b>PTA-MOF</b>      |           |            |           |            |           |
| N1-Cu1              | 1.921(3)  | N2-Cu1     | 1.968(3)  | O6-Cu1     | 2.060(3)  |
| O7-Cu1              | 2.298(3)  | O1-Cu1     | 2.093(3)  | O12-Cu1    | 2.316(3)  |
| O2-K1 <sup>i</sup>  | 2.814(4)  | O5-K1      | 2.580(4)  | K1-O13     | 2.854(4)  |
| K1-O7 <sup>ii</sup> | 2.939(4)  |            |           |            |           |
| N1-Cu1-O6           | 80.01(12) | N1-Cu1-O1  | 78.53(12) | N2-Cu1-O7  | 76.89(12) |
| O1-Cu1-O7           | 86.52(14) | N2-Cu1-O12 | 75.73(12) | O6-Cu1-O12 | 85.65(14) |

Symmetry codes: (i)  $x, y, z-1$ ; (ii)  $-x+1, y, -z+3/2$  for **Cu-PTA-MOF**.

**Table S3** Hydrogen bond parameters ( $\text{\AA}$ ,  $^{\circ}$ )

| D-H $\cdots$ A                        | D-H      | H $\cdots$ A | D $\cdots$ A | D-H $\cdots$ A |
|---------------------------------------|----------|--------------|--------------|----------------|
| <b>Cu-PTA-MOF</b>                     |          |              |              |                |
| C2—H2 $\cdots$ O4 <sup>vi</sup>       | 0.93     | 2.36         | 3.199 (5)    | 150            |
| O4—H4A $\cdots$ O2 <sup>vii</sup>     | 0.82     | 1.77         | 2.573 (5)    | 165            |
| O8—H8 $\cdots$ O13 <sup>ii</sup>      | 0.82     | 1.69         | 2.497 (5)    | 166            |
| O9—H9 $\cdots$ O6 <sup>iii</sup>      | 0.82     | 1.80         | 2.578 (4)    | 159            |
| O13—H13B $\cdots$ O11 <sup>viii</sup> | 0.83 (2) | 1.85 (2)     | 2.524 (5)    | 137            |
| O13—H13A $\cdots$ O1 <sup>iv</sup>    | 0.85 (2) | 1.98 (3)     | 2.665 (5)    | 136            |

Symmetry codes: (ii)  $-x+1, y, -z+3/2$ ; (iii)  $x, -y+1, z-1/2$ ; (iv)  $x, y, z+1$ ; (vi)  $x, -y+2, z-1/2$ ; (vii)  $x, -y+2, z+1/2$ ; (viii)  $-x, y, -z+3/2$  for **Cu-PTA-MOF**.

**Table.S4** XRD information of PPY and PANI

| <b>Samples</b> | <b>2<math>\theta</math>(deg.)</b> | <b><math>\theta</math>(deg.)</b> | <b>d (nm)</b> | <b>FWHM (<math>\beta</math>)</b> | <b>D(nm)</b> |
|----------------|-----------------------------------|----------------------------------|---------------|----------------------------------|--------------|
| Polypyrrole    | 23.16°                            | 11.58°                           | 0.6941        | 0.652                            | 56           |
| Polyaniline    | 25.89°                            | 12.94°                           | 0.3622        | 0.269                            | 63           |

## FTIR Analysis

Fourier transform infrared spectrum was measured using ATR sample compartment on Bruker Tensor-27 spectrophotometer (Billerica, MA, USA) in the range of 400-4000  $\text{cm}^{-1}$ . FTIR spectrum of *Cu-PTA-MOF* is presented in **Fig. S1**. Characteristic band of O-H at 3083  $\text{cm}^{-1}$  indicates presence of water molecule. The characteristic bands for the asymmetric and symmetric stretches of carboxylate group were found at 1618, 1597 and 1436 and 1354  $\text{cm}^{-1}$  respectively. Shifts of the asymmetric  $\nu_{\text{as}}$  (COO) and symmetric  $\nu_{\text{s}}$ (COO) modes wave numbers upon coordination indicates the binding of PTA ligand to the metal.

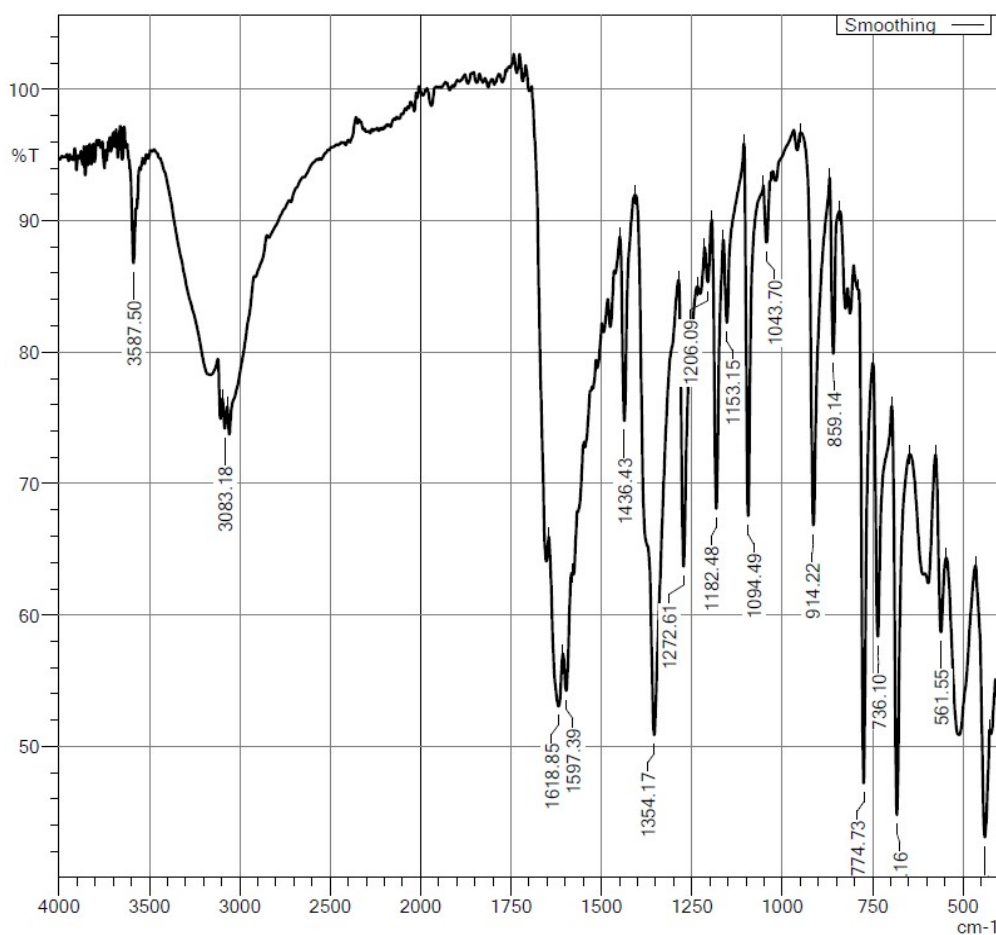

**Fig. S1:** FTIR spectrum of *Cu-PTA-MOF*

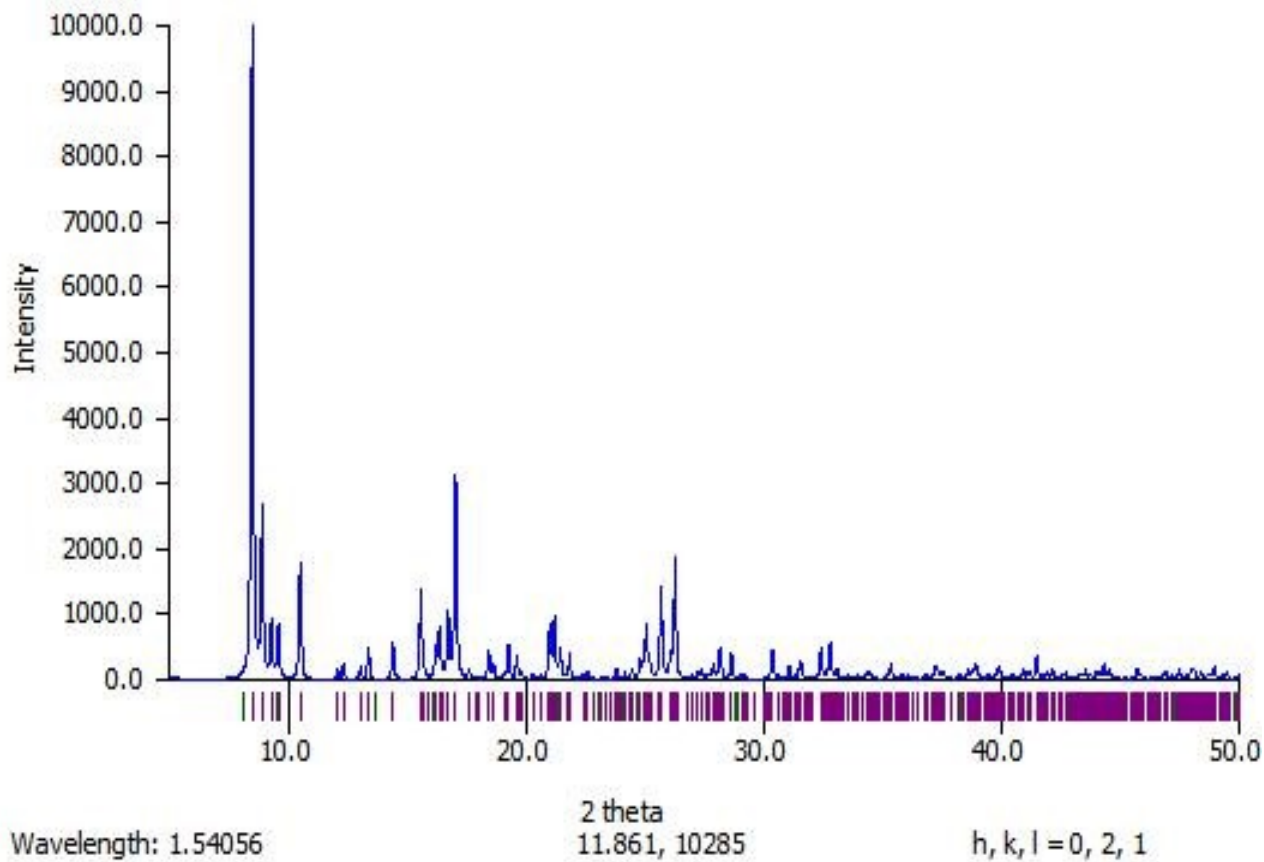

**Fig. S2:** Simulated powder XRD diffractogram of *Cu-PTA-MOF*

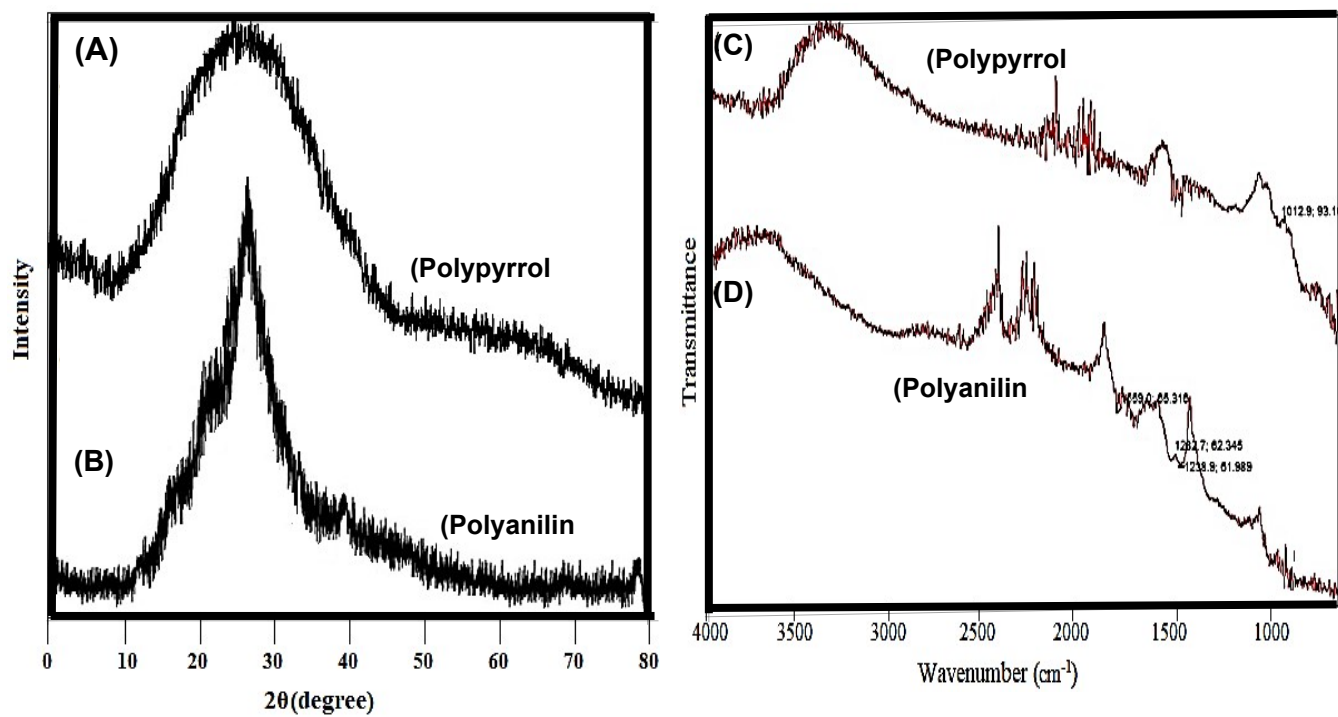

**Fig. S3:** (A) PXRD spectra of pure PPY and (B) pure PANI. (C) FTIR spectra of pure PPY and (D) pure PANI.

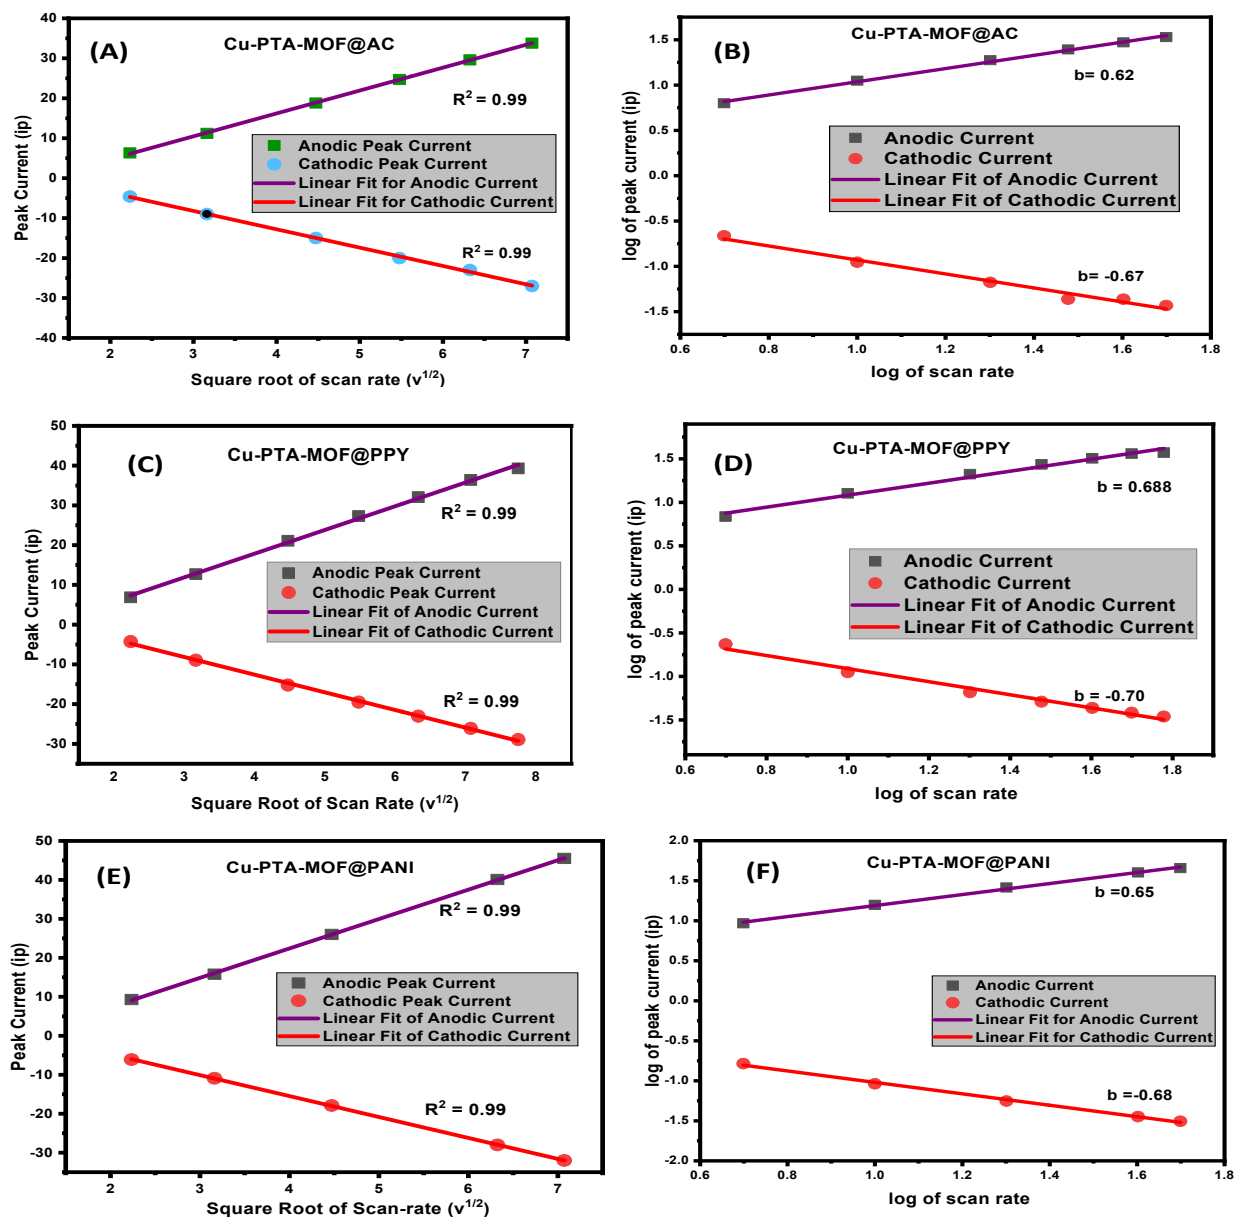

**Fig. S4:** (A) Cathodic and anodic peaks for Cu-PTA-MOF@AC as a function of scan rate  $v^{1/2}$ . (B) Slope for peak current log for the Cu-PTA-MOF@AC as a function of scan rates log. (C) As a function of scan rate  $v^{1/2}$ , Cathodic and anodic peaks for Cu-PTA-MOF@PPY. (D) Slope for peak currents log for the Cu-PTA-MOF@PPY as a function of scan rates log. (E) Cu-PTA-MOF@PANI cathodic and anodic peaks as a function of scan rate  $v^{1/2}$ . (F) Slope for peak currents log for the Cu-PTA-MOF@PANI as a function of scan rates log.
